# Supplementary material
Source: PubMed Central journal article supplement (PMC8575453)

Unedited gel: Figure 1C

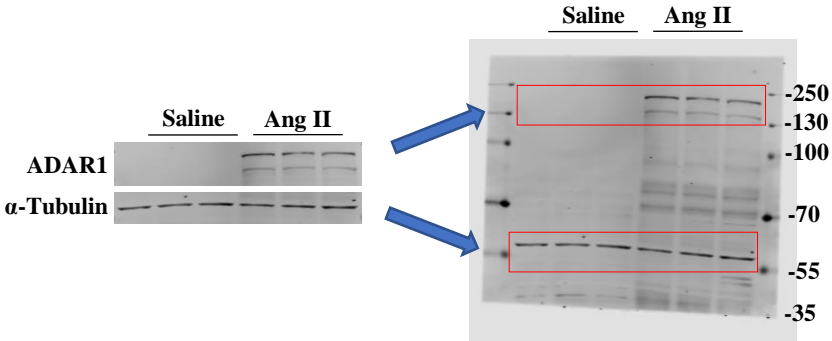

Full unedited gel for Figure 1G

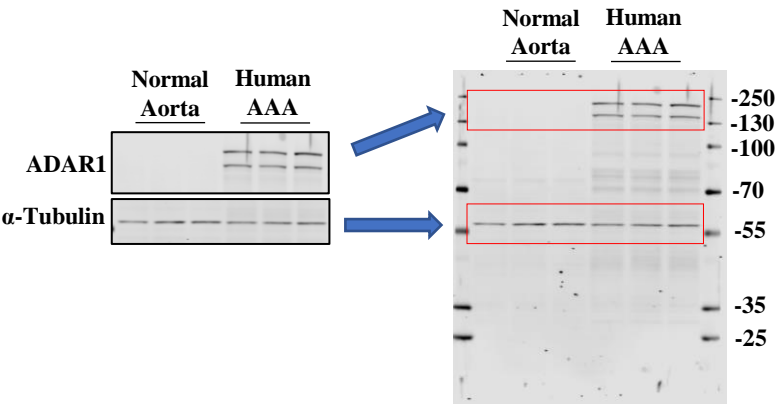

Unedited gel: Figure 3A

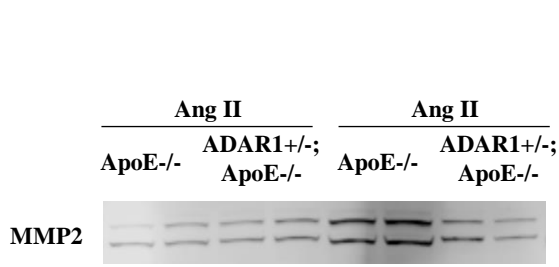

| Ang II              |                                               | Ang II              |                                               |
|---------------------|-----------------------------------------------|---------------------|-----------------------------------------------|
| ApoE <sup>-/-</sup> | ADAR1 <sup>+/-</sup> ;<br>ApoE <sup>-/-</sup> | ApoE <sup>-/-</sup> | ADAR1 <sup>+/-</sup> ;<br>ApoE <sup>-/-</sup> |

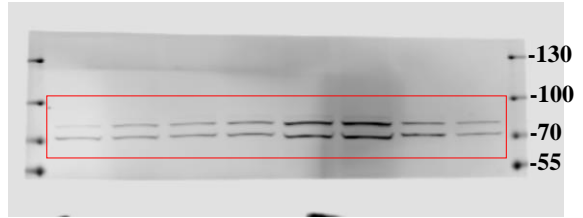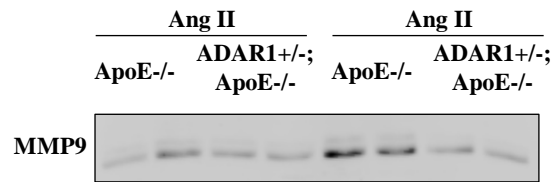

| Ang II              |                                               | Ang II              |                                               |
|---------------------|-----------------------------------------------|---------------------|-----------------------------------------------|
| ApoE <sup>-/-</sup> | ADAR1 <sup>+/-</sup> ;<br>ApoE <sup>-/-</sup> | ApoE <sup>-/-</sup> | ADAR1 <sup>+/-</sup> ;<br>ApoE <sup>-/-</sup> |

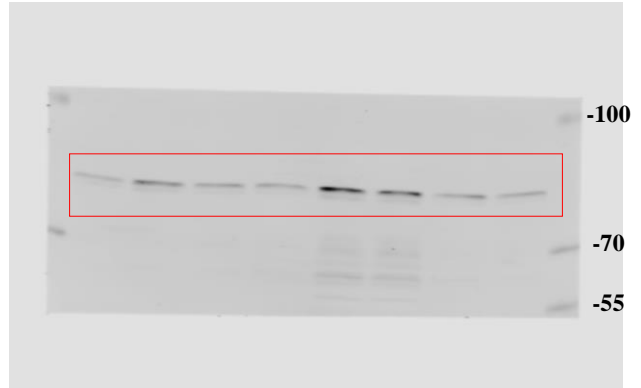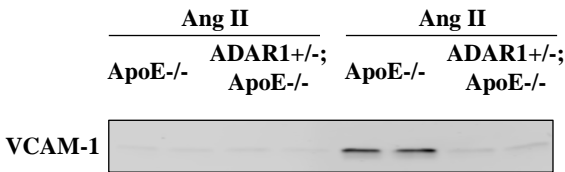

| Ang II              |                                               | Ang II              |                                               |
|---------------------|-----------------------------------------------|---------------------|-----------------------------------------------|
| ApoE <sup>-/-</sup> | ADAR1 <sup>+/-</sup> ;<br>ApoE <sup>-/-</sup> | ApoE <sup>-/-</sup> | ADAR1 <sup>+/-</sup> ;<br>ApoE <sup>-/-</sup> |

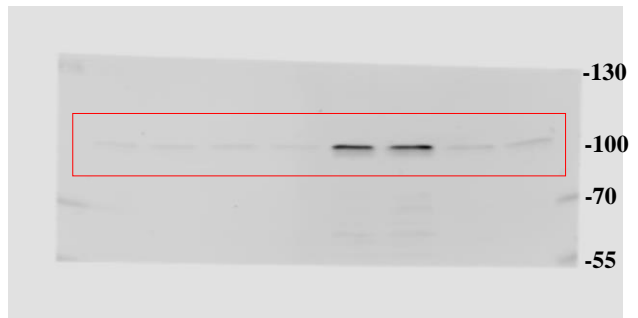

Unedited gel: Figure 3A continued

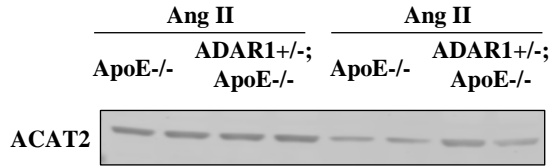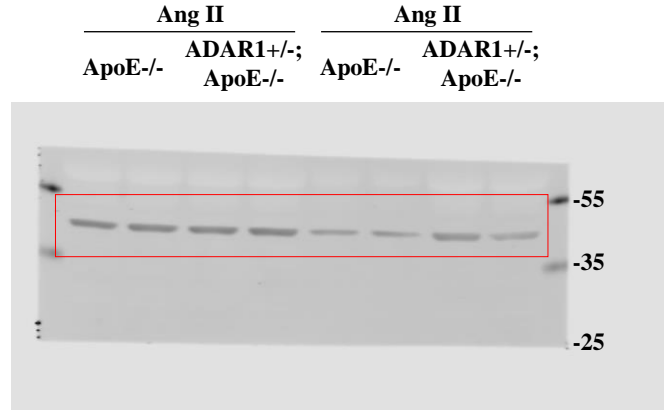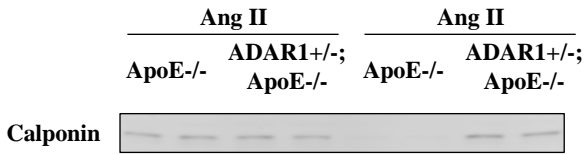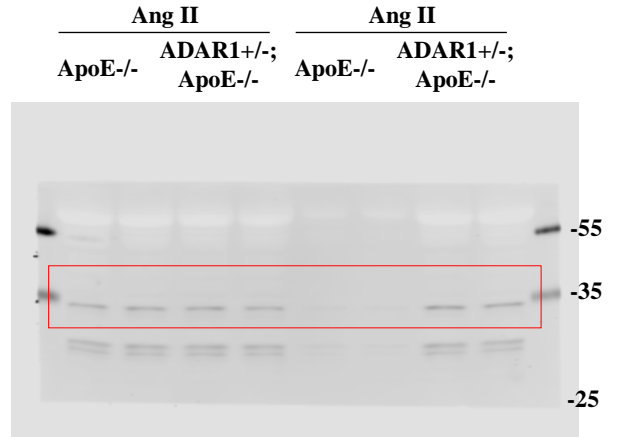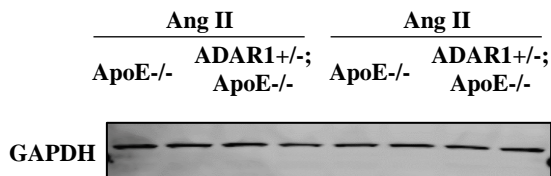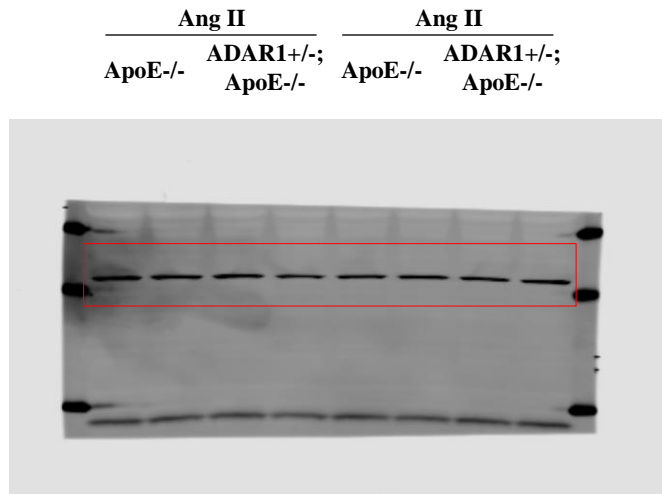

Unedited gel: Figure 6A

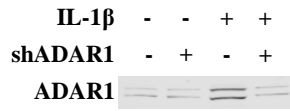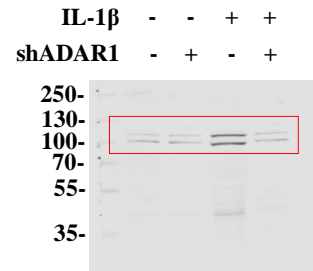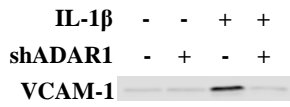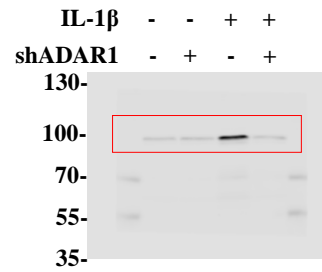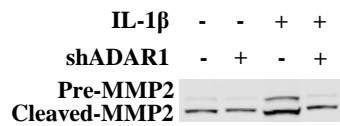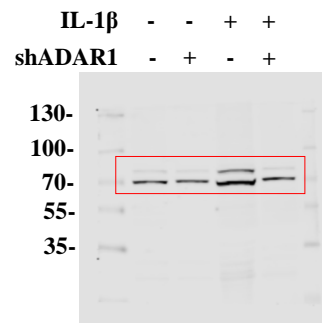

Unedited gel: Figure 6A continued

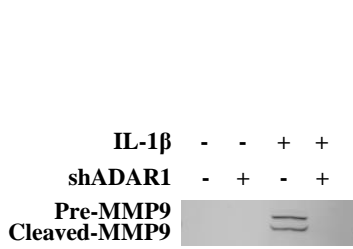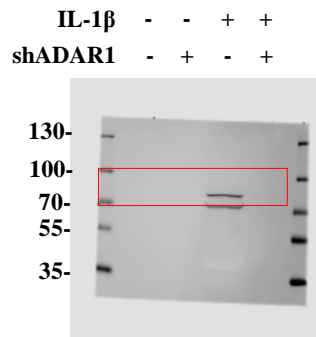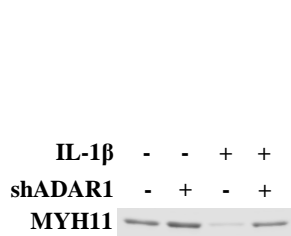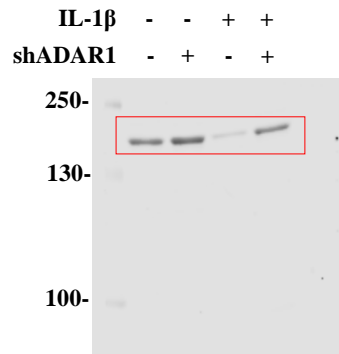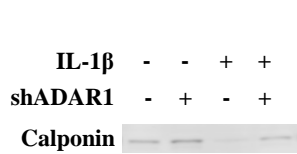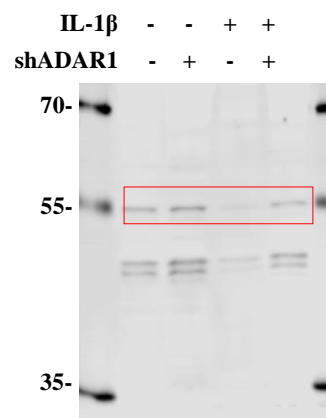

Unedited gel: Figure 6A continued

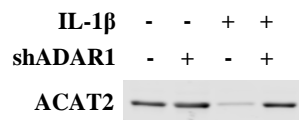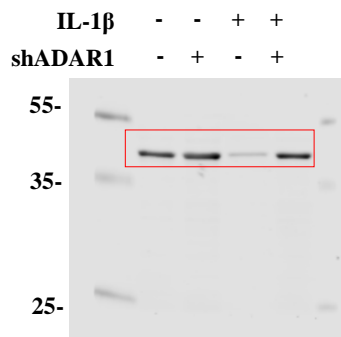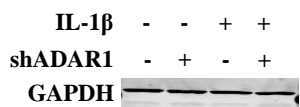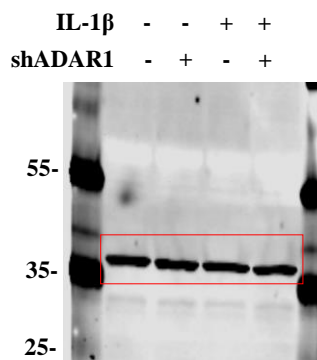

Unedited gel: Figure 7D

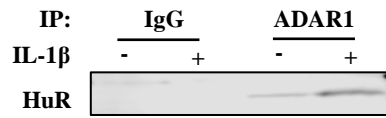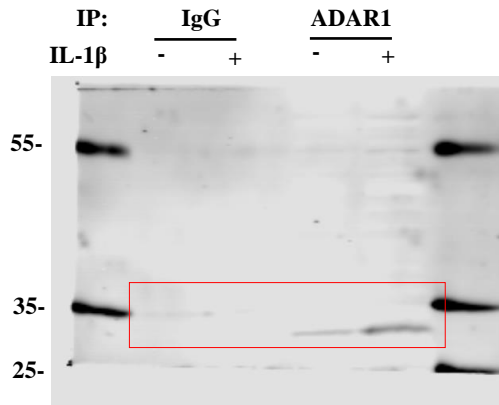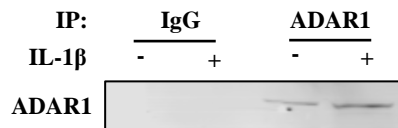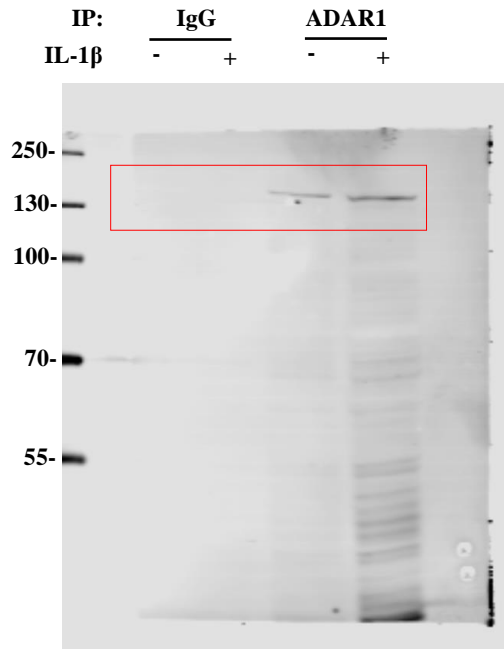

Unedited gel: Figure 7D continued

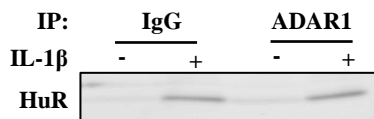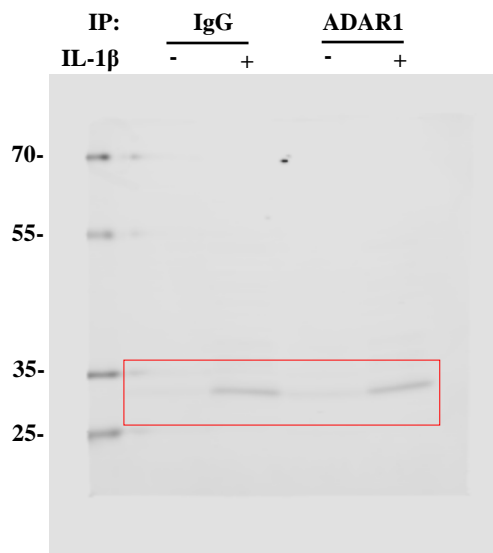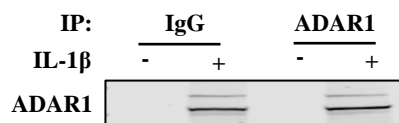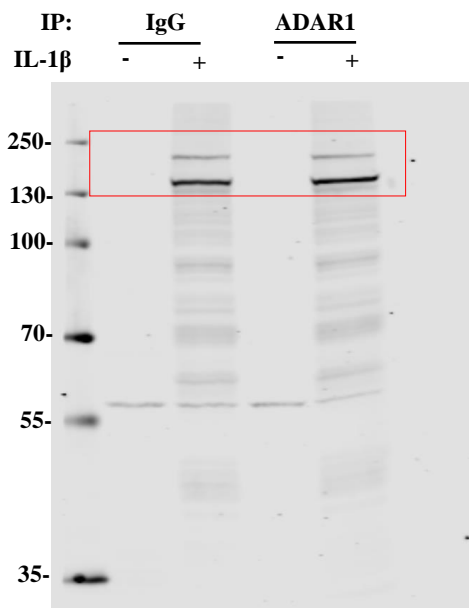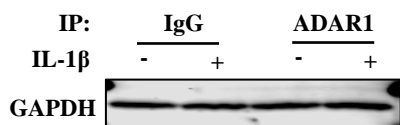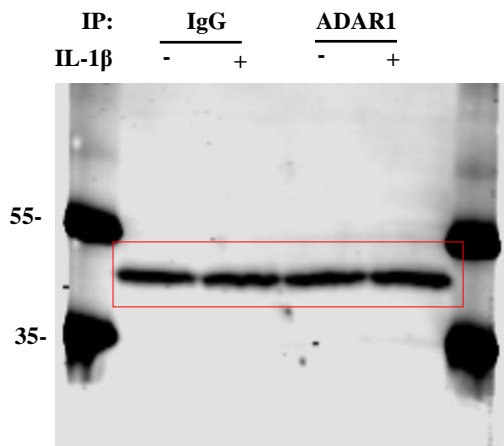



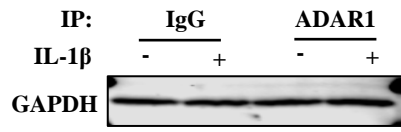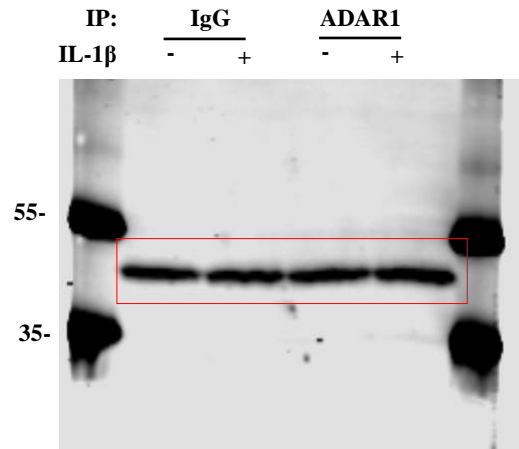

Supplement: NIHMS1743039-supplement-319374_Uncut_Gel_Blots.pdf [file NIHMS1743039-supplement-319374_Uncut_Gel_Blots.pdf]
