# Supplementary material
Source: PubMed Central journal article supplement (PMC8575453)
Supplement: NIHMS1743039-supplement-Major_Resources_Table.pdf [file NIHMS1743039-supplement-Major_Resources_Table.pdf]

## Major Resources Table

In order to allow validation and replication of experiments, all essential research materials listed in the Methods should be included in the Major Resources Table below. Authors are encouraged to use public repositories for protocols, data, code, and other materials and provide persistent identifiers and/or links to repositories when available. Authors may add or delete rows as needed.

### Animals (in vivo studies)

| Species                             | Vendor or Source                            | Background Strain | Sex | Persistent ID / URL                                                               |
|-------------------------------------|---------------------------------------------|-------------------|-----|-----------------------------------------------------------------------------------|
| ADAR1+/-                            | Jackson Laboratory                          | C57BL6J           | M   | <a href="https://www.jax.org/strain/016160">https://www.jax.org/strain/016160</a> |
| APOE-/-                             | Jackson Laboratory                          | C57BL6J           | M   | <a href="https://www.jax.org/strain/002052">https://www.jax.org/strain/002052</a> |
| Myh11-CreERT2 Eyfp ApoE-/-          | Dr. Gary K. Owens<br>University of Virginia | C57BL6J           | M   | N/A                                                                               |
| Myh11-CreERT2 Eyfp ApoE-/- ADAR1+/- | Own Breeding<br>Chen SY, Columbia, MO       | C57BL6J           | M   | <a href="https://www.jax.org/strain/016159">https://www.jax.org/strain/016159</a> |

### Genetically Modified Animals

|        | Species                   | Vendor or Source                 | Background Strain | Other Information | Persistent ID / URL                                                               |
|--------|---------------------------|----------------------------------|-------------------|-------------------|-----------------------------------------------------------------------------------|
| Parent | ADAR1+/-                  | Jackson Laboratory               | C57BL6J           | M/F               | <a href="https://www.jax.org/strain/016160">https://www.jax.org/strain/016160</a> |
| Parent | APOE-/-                   | Jackson Laboratory               | C57BL6J           | M/F               | <a href="https://www.jax.org/strain/002052">https://www.jax.org/strain/002052</a> |
| Parent | Myh11-CreERT2 YFP ApoE-/- | Dr. Owens GK<br>Univ of Virginia | C57BL6J           | M                 | N/A                                                                               |
| Parent | ADAR1fl/fl                | Jackson Laboratory               | C57BL6J           | M/F               | <a href="https://www.jax.org/strain/016159">https://www.jax.org/strain/016159</a> |

### Antibodies

| Target antigen | Vendor or Source          | Catalog #  | Working concentration     | Persistent ID / URL                                                                                                                                                                                                                                                                                                                                                             |
|----------------|---------------------------|------------|---------------------------|---------------------------------------------------------------------------------------------------------------------------------------------------------------------------------------------------------------------------------------------------------------------------------------------------------------------------------------------------------------------------------|
| GAPDH          | Proteintech               | 1E6D9      | WB (1:10,000)             | <a href="https://www.ptglab.com/products/GAPDH-Antibody-60004-1-1g.htm">https://www.ptglab.com/products/GAPDH-Antibody-60004-1-1g.htm</a>                                                                                                                                                                                                                                       |
| ADAR1          | Cell Signaling Technology | 81284      | IHC (1:100)<br>IP (1:100) | <a href="https://www.cellsignal.com/products/primary-antibodies/adar1-e6x9r-xp-rabbit-mab/81284?site-search-type=Products&amp;N=4294956287&amp;Ntt=adar1&amp;fromPage=plp">https://www.cellsignal.com/products/primary-antibodies/adar1-e6x9r-xp-rabbit-mab/81284?site-search-type=Products&amp;N=4294956287&amp;Ntt=adar1&amp;fromPage=plp</a>                                 |
| ACTA2          | Cell Signaling Technology | 19245      | WB (1:3000)               | <a href="https://www.cellsignal.com/products/primary-antibodies/a-smooth-muscle-actin-d4k9n-xp-rabbit-mab/19245?site-search-type=Products&amp;N=4294956287&amp;Ntt=acta2&amp;fromPage=plp">https://www.cellsignal.com/products/primary-antibodies/a-smooth-muscle-actin-d4k9n-xp-rabbit-mab/19245?site-search-type=Products&amp;N=4294956287&amp;Ntt=acta2&amp;fromPage=plp</a> |
| MMP-2          | Abcam                     | ab97779    | WB (1:1000)               | <a href="https://www.abcam.com/mmp2-antibody-ab97779.html">https://www.abcam.com/mmp2-antibody-ab97779.html</a>                                                                                                                                                                                                                                                                 |
| MMP-9          | Proteintech               | 10375-2-AP | WB (1:1000)               | <a href="https://www.ptglab.com/products/MMP9-Antibody-10375-2-AP.htm">https://www.ptglab.com/products/MMP9-Antibody-10375-2-AP.htm</a>                                                                                                                                                                                                                                         |
| VCAM-1         | Sigma Aldrich             | SAB1406579 | WB (1:1000)               | <a href="https://www.sigmaaldrich.com/US/en/product/sigma/sab1406579">https://www.sigmaaldrich.com/US/en/product/sigma/sab1406579</a>                                                                                                                                                                                                                                           |
| Calponin       | Cell Signaling Technology | 17819      | WB (1:1000)               | <a href="https://www.cellsignal.com/products/primary-antibodies/calponin-1-d8l2t-xp-rabbit-mab/17819">https://www.cellsignal.com/products/primary-antibodies/calponin-1-d8l2t-xp-rabbit-mab/17819</a>                                                                                                                                                                           |
| ADAR1          | Santa Cruz                | sc-271854  | WB (1:500)                | <a href="https://www.scbt.com/p/adar1-antibody-d-8">https://www.scbt.com/p/adar1-antibody-d-8</a>                                                                                                                                                                                                                                                                               |
| MYH11          | Abcam                     | ab82541    | WB (1:1000)               | <a href="https://www.abcam.com/smooth-muscle-myosin-heavy-chain-11-antibody-ab82541.html">https://www.abcam.com/smooth-muscle-myosin-heavy-chain-11-antibody-ab82541.html</a>                                                                                                                                                                                                   |
| α-Tubulin      | Sigma Aldrich             | T5168      | WB (1:1000)               | <a href="https://www.sigmaaldrich.com/US/en/product/sigma/t5168">https://www.sigmaaldrich.com/US/en/product/sigma/t5168</a>                                                                                                                                                                                                                                                     |

|                                                  |                           |            |               |                                                                                                                                                                                                                                                                 |
|--------------------------------------------------|---------------------------|------------|---------------|-----------------------------------------------------------------------------------------------------------------------------------------------------------------------------------------------------------------------------------------------------------------|
| ACTA2                                            | Sigma Aldrich             | A2547-.5ML | IHC (1:100)   | <a href="https://www.sigmaaldrich.com/US/en/product/sigma/a2547?context=product">https://www.sigmaaldrich.com/US/en/product/sigma/a2547?context=product</a>                                                                                                     |
| IL-1 $\beta$                                     | Cell Signaling Technology | 12242      | WB (1:1000)   | <a href="https://www.cellsignal.com/products/primary-antibodies/il-1b-3a6-mouse-mab/12242">https://www.cellsignal.com/products/primary-antibodies/il-1b-3a6-mouse-mab/12242</a>                                                                                 |
| IRDye <sup>®</sup> 680RD<br>Goat anti-Rabbit IgG | IRDye                     | 926-68071  | WB (1:15,000) | <a href="https://www.licor.com/bio/reagents/irdye-680rd-goat-anti-rabbit-igg-secondary-antibody">https://www.licor.com/bio/reagents/irdye-680rd-goat-anti-rabbit-igg-secondary-antibody</a>                                                                     |
| IRDye <sup>®</sup> 680RD<br>Goat anti-Mouse IgG  | IRDye                     | 926-68070  | WB (1:15,000) | <a href="https://www.licor.com/bio/reagents/irdye-680rd-goat-anti-mouse-igg-secondary-antibody">https://www.licor.com/bio/reagents/irdye-680rd-goat-anti-mouse-igg-secondary-antibody</a>                                                                       |
| Goat anti-Mouse IgG (H+L), Texas Red-X           | Invitrogen                | T-862      | 2 $\mu$ g/mL  | <a href="https://www.thermofisher.com/antibody/product/Goat-anti-Mouse-IgG-H-L-Cross-Adsorbed-Secondary-Antibody-Polyclonal/T-862">https://www.thermofisher.com/antibody/product/Goat-anti-Mouse-IgG-H-L-Cross-Adsorbed-Secondary-Antibody-Polyclonal/T-862</a> |
| Goat anti-Rabbit IgG (H+L), FITC                 | Invitrogen                | 31635      | 2 $\mu$ g/mL  | <a href="https://www.thermofisher.com/antibody/product/Goat-anti-Rabbit-IgG-H-L-Secondary-Antibody-Polyclonal/31635">https://www.thermofisher.com/antibody/product/Goat-anti-Rabbit-IgG-H-L-Secondary-Antibody-Polyclonal/31635</a>                             |
|                                                  |                           |            |               |                                                                                                                                                                                                                                                                 |

#### DNA/cDNA Clones

| Clone Name             | Sequence                                                                                                                                                                                                                                                                                                                                                                                                                                                                                                                                                                                                                                                                               | Source / Repository | Persistent ID / URL                                                                                                                       |
|------------------------|----------------------------------------------------------------------------------------------------------------------------------------------------------------------------------------------------------------------------------------------------------------------------------------------------------------------------------------------------------------------------------------------------------------------------------------------------------------------------------------------------------------------------------------------------------------------------------------------------------------------------------------------------------------------------------------|---------------------|-------------------------------------------------------------------------------------------------------------------------------------------|
| Ad-shADAR1             | <p>Top strand: 5'- CGC GTC GAT ACA ATC CTC AGT GTT CTC TGT ATG TAT TCA AGA GAT ACA TAC AGA GAA CAC TGA GGA TTG TAT CTT TTT TCC AAA-3'</p> <p>Bottom strand: 5'-AGC CAG GAT TTG GCG GAC CTT CTC GAA CCA CAA GTT CTC TGT GGT TCG AGA AGG TCC GCC AAA TCC TGG AAA AAA GTT TTC GA-3'</p>                                                                                                                                                                                                                                                                                                                                                                                                   | The PI's Lab        | N/A                                                                                                                                       |
| OHu23723 (HuR plasmid) | <p>ATGTCTAATG GTTATGAAGA CCACATGGCC GAAGACTGCA GGGGTGACAT CGGGAGAACG AATTGATCG TCAACTACCT CCCTCAGAAC ATGACCCAGG ATGAGTTACG AAGCCTGTTC AGCAGCATTG GTGAAGTTGA ATCTGCAAAA CTTATTCCGGG ATAAAGTAGC AGGACACAGC TTGGGCTATG GCTTTGTGAA CTACGTGACC GCGAAGGATG CAGAGAGAGC GATCAACACG CTGAACGGCT TGAGGCTCCA GTCAAAAACC ATTAAGGTGT CGTATGCTCG CCCGAGCTCA GAGGTGATCA AAGACGCCAA CTTGTACATC AGCGGGCTCC CGCGGACCAT GACCCAGAAG GACGTAGAAG ACATGTTCTC TCGGTTTGGG CGGATCATCA ACTCGCGGGT CCTCGTGGAT CAGACTACAG GTTTGTCAG AGGGGTTGCG TTTATCCGGT TTGACAAACG GTCGGAGGCA GAAGAGGCAA TTACCAGTTT CAATGGTCAT AAACCCCCAG GTTCCTCTGA GCCATCACA GTGAAGTTTG CAGCCAACCC CAACCGAAC AAAACGTGG CACTCCTCTC GCAGCTGTAC</p> | Genescript          | <a href="https://www.genescript.com/gene/homo-sapiens/1994/elavl1.html">https://www.genescript.com/gene/homo-sapiens/1994/elavl1.html</a> |

|  |                                                                                                                                                                                                                                                                                                                                                                                                                                                                      |  |  |
|--|----------------------------------------------------------------------------------------------------------------------------------------------------------------------------------------------------------------------------------------------------------------------------------------------------------------------------------------------------------------------------------------------------------------------------------------------------------------------|--|--|
|  | CACTCGCCAG CGCGACGGTT CGGAGGCCCC<br>GTTACCACC AGGCGCAGAG ATTCAGGTT<br>TCCCCATGG GCGTCGATCA CATGAGCGGG<br>CTCTCTGGCG TCAACGTGCC AGGAAACGCC<br>TCCTCCGGCT GGTGCATTTT CATCTACAAC<br>CTGGGGCAGG ATGCCGACGA GGGGATCCTC<br>TGGCAGATGT TTGGGCCGTT TGGTGCCGTC<br>ACCAATGTGA AAGTGATCCG CGACTTCAAC<br>ACCAACAAGT GCAAAGGGTT TGGCTTTGTG<br>ACCATGACAA ACTATGAAGA AGCCGCGATG<br>GCCATAGCCA GCCTGAACGG CTACCGCCTG<br>GGGGACAAAA TCTTACAGGT TTCCTTCAAA<br>ACCAACAAGT CCCACAAATA A |  |  |
|--|----------------------------------------------------------------------------------------------------------------------------------------------------------------------------------------------------------------------------------------------------------------------------------------------------------------------------------------------------------------------------------------------------------------------------------------------------------------------|--|--|

## Cultured Cells

| Name                                       | Vendor or Source | Sex (F, M, or unknown) | Persistent ID / URL |
|--------------------------------------------|------------------|------------------------|---------------------|
| Mouse abdominal aortic smooth muscle cells | Chen Lab         | M                      | N/A                 |

## Primers

| Name of Target | Forward Primer (5' to 3')          | Reverse Primer (5' to 3')     |
|----------------|------------------------------------|-------------------------------|
| pre-MMP2       | CAC CAT CGC CCA TCA TCA AG         | AGC CAG CAT AGC AAC TTA CCA   |
| mature-MMP2    | TCG CCC ATC ATC AAG TTC CC         | CCT TGG GGC AGC CAT AGA AA    |
| pre-MMP9       | TGG ACA TTT ATT CTC CAC TGT GC     | TCC CAC TTA CCT CTG GTG TGT C |
| mature-MMP9    | TCG AAG GCG ACC TCA AGT G          | TTC GGT GTA GCT TTG GAT CCA   |
| Pre-VCAM1      | TGAGCTTTGTTCCCAGCCTC               | GTCATGGTTTGTGGCGAACA          |
| mature- VCAM1  | TACGGTACGGGGACCTGTTT               | AAAAGACAAGTCAAATGAAGTAGCA     |
| Pre-ACTA2      | CAGTCGCCATCAGGGTAAGT               | CGAGGTTCTGCAGAGACAGA          |
| mature-ACTA2   | GGAGAAGCCCAGCCAGTC                 | CACGATGGATGGGAAAACAG          |
| RIP-MMP2       | ACCCTAGGGGATGCTTGGAT               | ACGAGCGAAGGGCATAACAAA         |
| RIP-MMP9       | TTCACCGGCTAAACCACCTC               | TAACGCCCGAGTAGAGAGCCT         |
| CYP            | CAA CTC CCT CAA GAT TGT CAG<br>CAA | GGC ATG GAC TGT GGT CAT GA    |
| GAPDH          | CGA CTG TGG ACA GCT CTA AT         | CCT GAG CTA CAG AAG GAA TG    |

## Other

| Description                         | Source / Repository          | Persistent ID / URL                                                                                                                                                                                                                                                                                                                                                                                                                                                                   |
|-------------------------------------|------------------------------|---------------------------------------------------------------------------------------------------------------------------------------------------------------------------------------------------------------------------------------------------------------------------------------------------------------------------------------------------------------------------------------------------------------------------------------------------------------------------------------|
| DMEM                                | Corning , 17-207-CV          | <a href="https://ecatalog.corning.com/life-sciences/b2b/US/en/Media,-Sera,-and-Reagents/Classical-Media/Dulbecco's-Modification-of-Eagle's-Medium-(DMEM)/Corning%C2%AE-DMEM-(Dulbecco%E2%80%99s-Modified-Eagle%E2%80%99s-Medium)/p/17-207-CV">https://ecatalog.corning.com/life-sciences/b2b/US/en/Media,-Sera,-and-Reagents/Classical-Media/Dulbecco's-Modification-of-Eagle's-Medium-(DMEM)/Corning%C2%AE-DMEM-(Dulbecco%E2%80%99s-Modified-Eagle%E2%80%99s-Medium)/p/17-207-CV</a> |
| FBS                                 | FBS, R&D, S11550 H           | <a href="https://www.rndsystems.com/products/fetal-bovine-serum-premium-select_s11550">https://www.rndsystems.com/products/fetal-bovine-serum-premium-select_s11550</a>                                                                                                                                                                                                                                                                                                               |
| L-glutamine                         | Hyclone , SH3003 4.01        | <a href="https://www.thomassci.com/Laboratory-Supplies/Tissue-Culture-Media/_/HyClone-L-Glutamine-200-mM-Solution">https://www.thomassci.com/Laboratory-Supplies/Tissue-Culture-Media/_/HyClone-L-Glutamine-200-mM-Solution</a>                                                                                                                                                                                                                                                       |
| Hematoxylin and eosin kit           | American MasterTech, KTHNEPT | <a href="https://www.statlab.com/ds-h-e-stain-kitkthnept.html">https://www.statlab.com/ds-h-e-stain-kitkthnept.html</a>                                                                                                                                                                                                                                                                                                                                                               |
| Elastica van Gieson kit             | Sigma Aldrich, HT25A         | <a href="https://www.sigmaaldrich.com/catalog/product/sigma/ht25a?lang=en&amp;region=US">https://www.sigmaaldrich.com/catalog/product/sigma/ht25a?lang=en&amp;region=US</a>                                                                                                                                                                                                                                                                                                           |
| IL-1 $\beta$                        | 201-LB-025                   | <a href="https://www.rndsystems.com/products/recombinant-human-il-1-beta-il-1f2-protein_201-lb#product-reviews">https://www.rndsystems.com/products/recombinant-human-il-1-beta-il-1f2-protein_201-lb#product-reviews</a>                                                                                                                                                                                                                                                             |
| DYNAREX ultrasound transmission gel | D-1243                       | <a href="https://www.becklee.com/1243.html">https://www.becklee.com/1243.html</a>                                                                                                                                                                                                                                                                                                                                                                                                     |
| Protease Inhibitor                  | Sigma Aldrich, P8340         | <a href="https://www.sigmaaldrich.com/catalog/product/sigma/p8340?lang=en&amp;region=US">https://www.sigmaaldrich.com/catalog/product/sigma/p8340?lang=en&amp;region=US</a>                                                                                                                                                                                                                                                                                                           |
| Phosphatase Inhibitor               | Sigma Aldrich, P0044         | <a href="https://www.sigmaaldrich.com/catalog/product/sigma/p0044?lang=en&amp;region=US">https://www.sigmaaldrich.com/catalog/product/sigma/p0044?lang=en&amp;region=US</a>                                                                                                                                                                                                                                                                                                           |
| Actinomycin D                       | Sigma Aldrich,               |                                                                                                                                                                                                                                                                                                                                                                                                                                                                                       |
| Trizol                              | Thermo Scientific, 10296028  | <a href="https://www.thermofisher.com/order/catalog/product/10296028#/10296028">https://www.thermofisher.com/order/catalog/product/10296028#/10296028</a>                                                                                                                                                                                                                                                                                                                             |

|                                               |                         |                                                                                                                                                                                                                                                         |
|-----------------------------------------------|-------------------------|---------------------------------------------------------------------------------------------------------------------------------------------------------------------------------------------------------------------------------------------------------|
| iScript cDNA kit                              | Bio-Rad, 1708890        | <a href="https://www.bio-rad.com/en-us/sku/1708890-iscrypt-cdna-synthesis-kit-25-x-20-ul-rxns?ID=1708890">https://www.bio-rad.com/en-us/sku/1708890-iscrypt-cdna-synthesis-kit-25-x-20-ul-rxns?ID=1708890</a>                                           |
| SYBR Green master mix                         | GeneCopoeia, QP001      | <a href="https://www.genecopoeia.com/product/qpcr-products/qpcr-kits-and-primers/qpcr-primers/">https://www.genecopoeia.com/product/qpcr-products/qpcr-kits-and-primers/qpcr-primers/</a>                                                               |
| MyTaq™ HS Red Mix                             | BIO-25048               | <a href="https://www.bioline.com/mytaq-hs-red-mix.html">https://www.bioline.com/mytaq-hs-red-mix.html</a>                                                                                                                                               |
| EnzChek™ Gelatinase/Collagenase Assay Kit     | E12055                  | <a href="https://www.thermofisher.com/order/catalog/product/E12055#/E12055">https://www.thermofisher.com/order/catalog/product/E12055#/E12055</a>                                                                                                       |
| Duolink® In Situ Red Starter Kit Mouse/Rabbit | DUO92101-1KT            | <a href="https://www.sigmaaldrich.com/US/en/product/sigma/duo92101">https://www.sigmaaldrich.com/US/en/product/sigma/duo92101</a>                                                                                                                       |
| Osmotic minipumps                             | AP-2004                 | <a href="https://www.alzet.com/wp-content/uploads/2019/06/Specs-2004.pdf">https://www.alzet.com/wp-content/uploads/2019/06/Specs-2004.pdf</a>                                                                                                           |
| Angiotensin II acetate salt                   | 4006473.0100            | <a href="https://shop.bachem.com/4006473.html">https://shop.bachem.com/4006473.html</a>                                                                                                                                                                 |
| Collagenase type I                            | Sigma-Aldrich, C0130    | <a href="https://www.sigmaaldrich.com/US/en/product/sigma/c0130">https://www.sigmaaldrich.com/US/en/product/sigma/c0130</a>                                                                                                                             |
| Collagenase type XI                           | Sigma-Aldrich, C7657    | <a href="https://www.sigmaaldrich.com/US/en/product/sigma/c7657?gclid=EAlaIqobChMlhMS0y_Dg8glVPGpvBB0xWwy4EAAYASAAEgL_P_D_BwE">https://www.sigmaaldrich.com/US/en/product/sigma/c7657?gclid=EAlaIqobChMlhMS0y_Dg8glVPGpvBB0xWwy4EAAYASAAEgL_P_D_BwE</a> |
| Hyaluronidase type I-s                        | Sigma-Aldrich, H1115000 | <a href="https://www.sigmaaldrich.com/US/en/product/sial/h1115000">https://www.sigmaaldrich.com/US/en/product/sial/h1115000</a>                                                                                                                         |
| CD31 magnetic beads (Dynabeads)               | Invitrogen 11155D       | <a href="https://www.thermofisher.com/order/catalog/product/11155D#/11155D">https://www.thermofisher.com/order/catalog/product/11155D#/11155D</a>                                                                                                       |
